# Supplementary material for: Fe–N–C single-atom catalysts with an axial structure prepared by a new design and synthesis method for ORR
Source: Royal Society of Chemistry journal article supplement (doi:10.1039/d1nj01380g), 2021-01-01
Supplement: d1nj01380g1.pdf [file d1nj01380g1.pdf]

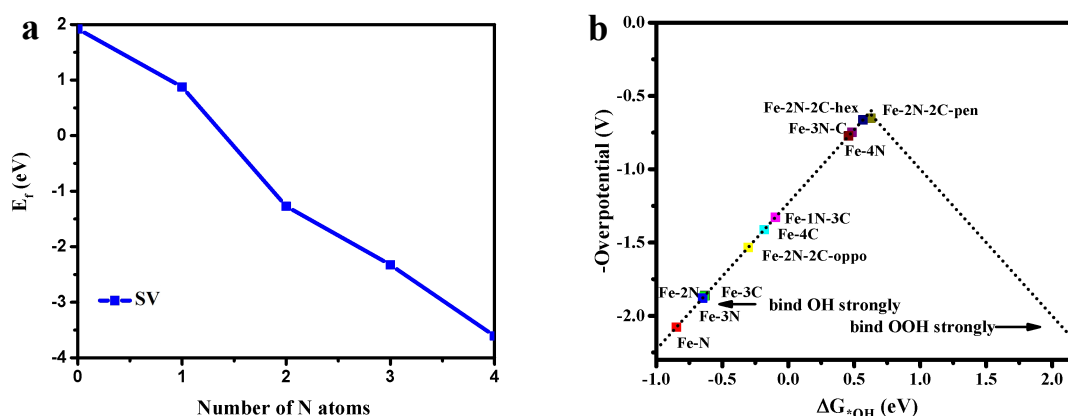

Fig. 1 a) Variations of formation energies with N atomic number and doping configuration. b) Trend in the theoretical overpotential for the ORR plotted against  $\Delta G^*OH$ .

1. In the double vacancy (DV), as the number of doped N atoms increases, the formation energy  $E_f$  becomes increasingly negative, resulting in Fe-4N defects being the most stable in the Fe-N-C catalyst.
2. The overpotential of the catalyst with double vacancy structure decreases with the incorporation of N atoms. It can be concluded that in the double-vacancy structure, the incorporation of an appropriate number of N atoms and different doping configurations can improve the ORR catalytic performance of the Fe-N coordination structure.

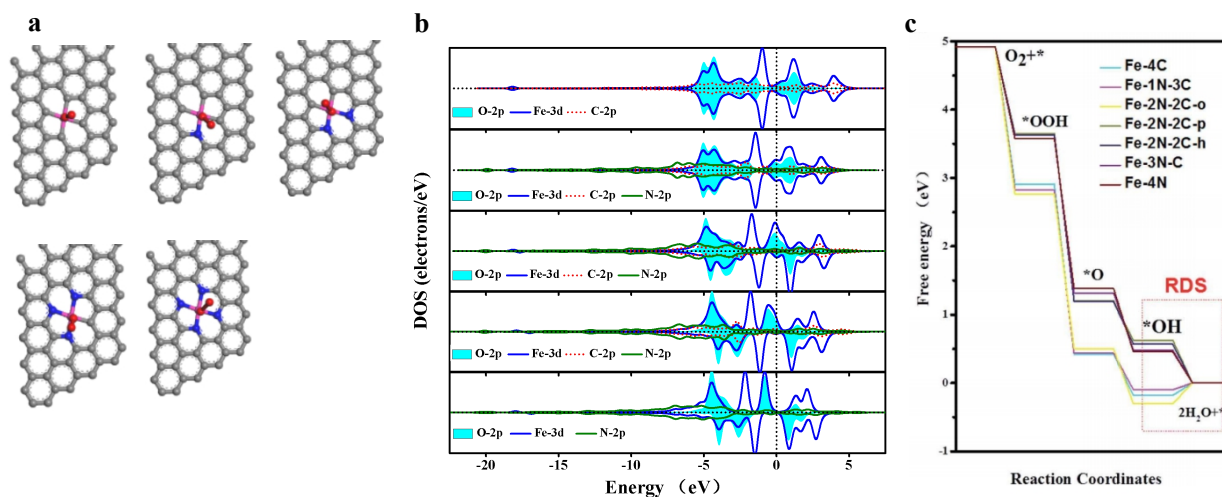

Fig. 2 a) O atoms are adsorbed on Fe-4C sites, Fe-1N-3C sites, Fe-2N-2C site, Fe-3N-C sites and Fe-4N sites. b) DOS diagram of O atoms adsorbed on Fe-N<sub>x</sub> active sites. c) Free energy profiles of Fe-N doped in double vacancy.

3. In the double-vacancy structure, the bond length of the Fe-O bond gradually increases as the number of N atoms increases. The interaction between Fe atoms and O atoms gradually weakens, weakening the strong binding force between oxygen-containing compounds and their surface sites will increase ORR activity.

**Supplementary Table 1.** Comparison of ORR performance between MnO<sub>2</sub>@Mn catalysts and the reported MnO<sub>x</sub>-based catalysts in literatures.

| Electrocatalysts              | E <sub>onset</sub> (V) | Current density at 0.88 V (mA cm <sup>-1</sup> ) | Reference |
|-------------------------------|------------------------|--------------------------------------------------|-----------|
| Fe-N <sub>5</sub> -C          | 0.93                   | 1.65                                             | This work |
| Pt/C                          | 0.93                   | 1.54                                             | This work |
| FePc                          | 0.92                   | 1.04                                             | This work |
| Fe-N <sub>x</sub> -C-1        | 0.93                   | 1.53                                             | Ref. 1    |
| Fe-NMP                        | 0.95                   | 1.28                                             | Ref. 2    |
| Czif-Fe(acac) <sub>3</sub> -6 | 0.925                  | 0.36                                             | Ref. 3    |
| Fe <sub>se</sub> -N-C         | 0.86                   | 0.58                                             | Ref. 4    |

### Supplementary References

1. Y. Liu, N. Huang, X. Zhang, X. Huang, Z. Xie, *J. Power Sources* **2019**, *412*, 125-133
2. M. Hossen, K. Artyushkova, P. Atanassov, A. Serov, *J. Power Sources* **2019**, *375*, 214-221
3. L. Gao, M. Xiao, Z. Jin, C. Liu, J. Zhua, J. Gec, W. Xing, *J. Energy Chemistry*. **2018**, *27*, 1668–1673
4. X. Ao, W. Zhang, B. Zhao, Y. Ding, G. Nam, L. Soule, A. Abdelhfiz, C. Wang, M. Liu, *Energy Environ. Sci.*, **2020**, *13*, 3032-3040
